# Supplementary material for: Effects of storage condition on the physicochemical characteristics of sunflower seed oil
Source: Royal Society of Chemistry journal article supplement (doi:10.1039/c9ra09215c), 2019-01-01
Supplement: c9ra09215c1.pdf [file c9ra09215c1.pdf]

**Supplemental tables:**

Table 1. The fatty acid compositions of sunflowerseed oil products stored at room temperature without light exposure (Group I).

| Storage<br>time<br>(month) | Fatty acids  |              |              |              |                 |                 |                 |                 |              |              |                |              |              |
|----------------------------|--------------|--------------|--------------|--------------|-----------------|-----------------|-----------------|-----------------|--------------|--------------|----------------|--------------|--------------|
|                            | C14:0<br>(%) | C16:0<br>(%) | C16:1<br>(%) | C18:0<br>(%) | C18:1n9c<br>(%) | C18:1n9t<br>(%) | C18:2n6t<br>(%) | C18:2n6c<br>(%) | C20:0<br>(%) | C20:1<br>(%) | C18:3n3<br>(%) | C22:0<br>(%) | C20:5<br>(%) |
| 0                          | 0.46±0.01    | 25.36±0.02   | 1.32±0.01    | 19.62±0.02   | 16.33±0.01      | 8.09±0.01       | 2.44±0.02       | 76.96±0.01      | 1.37±0.01    | 0.98±0.02    | 1.87±0.01      | 4.12±0.01    | 1.46±0.01    |
| 1                          | 0.45±0.01    | 25.58±0.03   | 1.28±0.02    | 19.93±0.08   | 16.48±0.02      | 8.21±0.01       | 2.42±0.04       | 76.74±0.04      | 1.40±0.01    | 0.98±0.01    | 1.87±0.01      | 4.20±0.05    | 1.48±0.03    |
| 2                          | 0.45±0.01    | 25.43±0.02   | 1.32±0.01    | 19.65±0.01   | 16.35±0.01      | 8.05±0.03       | 2.44±0.03       | 76.90±0.01      | 1.51±0.02    | 1.06±0.06    | 1.88±0.07      | 4.13±0.01    | 1.50±0.01    |
| 3                          | 0.44±0.01    | 25.41±0.01   | 1.33±0.01    | 19.55±0.03   | 16.41±0.01      | 7.90±0.03       | 2.39±0.07       | 76.89±0.01      | 1.43±0.03    | 1.02±0.05    | 1.86±0.04      | 4.14±0.01    | 1.53±0.04    |
| 4                          | 0.44±0.01    | 25.28±0.03   | 1.31±0.01    | 19.70±0.04   | 16.40±0.02      | 7.57±0.02       | 2.41±0.09       | 76.91±0.02      | 1.41±0.01    | 1.13±0.08    | 1.87±0.02      | 4.26±0.01    | 1.49±0.01    |
| 5                          | 0.44±0.01    | 25.37±0.01   | 1.27±0.01    | 17.99±0.11   | 16.79±0.01      | 2.63±0.07       | 1.50±0.05       | 77.26±0.02      | 5.41±0.03    | 0.75±0.01    | 1.22±0.02      | 2.30±0.01    | 0.57±0.01    |
| 6                          | 0.52±0.01    | 28.53±0.52   | 1.47±0.01    | 19.89±0.57   | 16.77±0.07      | -               | 2.39±0.15       | 77.41±0.07      | 1.17±0.03    | 0.20±0.01    | 0.37±0.01      | 2.90±0.09    | 0.80±0.03    |
| 7                          | 0.52±0.01    | 28.12±0.69   | 1.49±0.01    | 19.41±0.65   | 16.77±0.02      | -               | 2.43±0.08       | 77.49±0.13      | 1.15±0.04    | 0.20±0.01    | 0.38±0.01      | 2.83±0.11    | 0.91±0.03    |
| 8                          | 0.52±0.01    | 28.31±0.71   | 1.48±0.01    | 19.64±0.62   | 16.76±0.03      | -               | 2.52±0.05       | 77.55±0.13      | 1.16±0.03    | 0.20±0.01    | 0.37±0.01      | 2.87±0.10    | 0.80±0.03    |
| 9                          | 0.49±0.01    | 28.05±0.29   | 1.56±0.07    | 19.17±0.04   | 16.81±0.01      | -               | 2.68±0.03       | 77.49±0.02      | 1.11±0.01    | 0.21±0.01    | 0.43±0.03      | 2.62±0.06    | 0.49±0.01    |
| 10                         | 0.51±0.01    | 27.73±0.12   | 1.47±0.01    | 19.28±0.03   | 16.82±0.01      | -               | 2.39±0.11       | 77.50±0.01      | 1.15±0.01    | 0.20±0.01    | 0.37±0.01      | 2.85±0.06    | 0.79±0.03    |
| 11                         | 0.50±0.01    | 27.50±0.10   | 1.46±0.01    | 19.32±0.06   | 16.82±0.02      | -               | 2.25±0.02       | 77.58±0.12      | 1.18±0.01    | 0.19±0.01    | 0.37±0.01      | 3.01±0.04    | 0.98±0.02    |

**Supplemental tables:**

Table 2. The fatty acid compositions of sunflowerseed oil products stored at room temperature with light exposure (Group II).

| Storage<br>time<br>(month) | Fatty acids  |              |              |              |                 |                 |                 |                 |              |              |                |              |              |
|----------------------------|--------------|--------------|--------------|--------------|-----------------|-----------------|-----------------|-----------------|--------------|--------------|----------------|--------------|--------------|
|                            | C14:0<br>(%) | C16:0<br>(%) | C16:1<br>(%) | C18:0<br>(%) | C18:1n9c<br>(%) | C18:1n9t<br>(%) | C18:2n6t<br>(%) | C18:2n6c<br>(%) | C20:0<br>(%) | C20:1<br>(%) | C18:3n3<br>(%) | C22:0<br>(%) | C20:5<br>(%) |
| 0                          | 0.46±0.01    | 25.36±0.02   | 1.32±0.01    | 19.62±0.02   | 16.33±0.01      | 8.09±0.01       | 2.44±0.02       | 76.96±0.01      | 1.37±0.01    | 0.98±0.02    | 1.87±0.01      | 4.12±0.01    | 1.46±0.01    |
| 1                          | 0.46±0.01    | 25.54±0.14   | 1.29±0.02    | 19.80±0.37   | 16.41±0.15      | 8.17±0.07       | 2.35±0.03       | 76.88±0.16      | 1.38±0.04    | 0.98±0.01    | 1.85±0.03      | 4.15±0.12    | 1.46±0.01    |
| 2                          | 0.45±0.01    | 25.43±0.03   | 1.32±0.01    | 19.67±0.02   | 16.36±0.01      | 8.15±0.06       | 2.42±0.07       | 76.85±0.02      | 1.55±0.01    | 1.26±0.04    | 1.97±0.06      | 4.11±0.01    | 1.52±0.01    |
| 3                          | 0.44±0.01    | 25.40±0.02   | 1.33±0.01    | 19.57±0.03   | 16.43±0.01      | 7.84±0.01       | 2.44±0.02       | 76.87±0.02      | 1.42±0.01    | 1.03±0.04    | 1.88±0.04      | 4.14±0.02    | 1.54±0.04    |
| 4                          | 0.44±0.01    | 25.28±0.01   | 1.30±0.01    | 19.69±0.01   | 16.37±0.01      | 7.56±0.02       | 2.39±0.05       | 76.95±0.01      | 1.40±0.01    | 1.10±0.02    | 1.85±0.01      | 4.24±0.01    | 1.48±0.05    |
| 5                          | 0.44±0.01    | 25.43±0.05   | 1.27±0.01    | 18.06±0.05   | 16.78±0.01      | 2.64±0.01       | 1.49±0.05       | 77.26±0.02      | 5.40±0.03    | 0.76±0.01    | 1.23±0.01      | 2.32±0.03    | 0.52±0.01    |
| 6                          | 0.52±0.01    | 29.48±1.37   | 1.47±0.01    | 20.86±1.43   | 16.61±0.11      | -               | 2.44±0.12       | 77.32±0.25      | 1.23±0.08    | 0.31±0.01    | 0.38±0.01      | 3.10±0.28    | 0.89±0.08    |
| 7                          | 0.52±0.01    | 27.90±0.05   | 1.49±0.01    | 19.19±0.12   | 16.70±0.11      | -               | 2.56±0.05       | 77.57±0.09      | 1.13±0.01    | 0.31±0.01    | 0.38±0.01      | 2.80±0.05    | 0.95±0.07    |
| 8                          | 0.52±0.01    | 28.54±1.17   | 1.48±0.01    | 19.88±1.16   | 16.73±0.16      | -               | 2.38±0.15       | 77.42±0.14      | 1.18±0.07    | 0.30±0.01    | 0.39±0.01      | 2.92±0.22    | 0.95±0.12    |
| 9                          | 0.51±0.01    | 28.42±0.05   | 1.52±0.02    | 19.09±0.04   | 16.79±0.02      | -               | 2.79±0.06       | 77.45±0.02      | 1.08±0.01    | 0.31±0.01    | 0.43±0.01      | 2.53±0.02    | 0.51±0.01    |
| 10                         | 0.51±0.01    | 27.80±0.01   | 1.47±0.01    | 19.29±0.03   | 16.69±0.10      | -               | 2.46±0.02       | 77.61±0.10      | 1.14±0.01    | 0.31±0.01    | 0.39±0.01      | 2.83±0.01    | 0.81±0.01    |
| 11                         | 0.51±0.01    | 27.42±0.09   | 1.45±0.01    | 19.35±0.07   | 16.80±0.03      | -               | 2.28±0.03       | 77.57±0.15      | 1.18±0.01    | 0.29±0.01    | 0.38±0.01      | 3.03±0.03    | 1.07±0.01    |

**Supplemental tables:**

Table 3. The fatty acid compositions of sunflowerseed oil products stored at 25 °C without light exposure (Group III).

| Storage<br>time<br>(month) | Fatty acids  |              |              |              |                 |                 |                 |                 |              |              |                |              |              |
|----------------------------|--------------|--------------|--------------|--------------|-----------------|-----------------|-----------------|-----------------|--------------|--------------|----------------|--------------|--------------|
|                            | C14:0<br>(%) | C16:0<br>(%) | C16:1<br>(%) | C18:0<br>(%) | C18:1n9c<br>(%) | C18:1n9t<br>(%) | C18:2n6t<br>(%) | C18:2n6c<br>(%) | C20:0<br>(%) | C20:1<br>(%) | C18:3n3<br>(%) | C22:0<br>(%) | C20:5<br>(%) |
| 0                          | 0.46±0.01    | 25.36±0.02   | 1.32±0.01    | 19.62±0.02   | 16.33±0.01      | 8.09±0.01       | 2.44±0.02       | 76.96±0.01      | 1.37±0.01    | 0.98±0.02    | 1.87±0.01      | 4.12±0.01    | 1.46±0.01    |
| 1                          | 0.46±0.01    | 25.44±0.02   | 1.30±0.01    | 19.55±0.02   | 16.32±0.01      | 8.13±0.01       | 2.32±0.01       | 76.98±0.01      | 1.37±0.01    | 0.99±0.03    | 1.81±0.01      | 4.08±0.01    | 1.47±0.02    |
| 2                          | 0.45±0.01    | 25.44±0.02   | 1.32±0.01    | 19.66±0.01   | 16.36±0.01      | 8.04±0.03       | 2.42±0.01       | 76.91±0.01      | 1.50±0.01    | 1.05±0.03    | 1.86±0.05      | 4.12±0.01    | 1.49±0.01    |
| 3                          | 0.44±0.01    | 25.40±0.01   | 1.33±0.01    | 19.56±0.03   | 16.41±0.01      | 7.84±0.01       | 2.44±0.05       | 76.89±0.02      | 1.42±0.02    | 1.02±0.03    | 1.86±0.04      | 4.14±0.01    | 1.53±0.02    |
| 4                          | 0.44±0.01    | 25.27±0.05   | 1.30±0.01    | 19.69±0.03   | 16.37±0.01      | 7.59±0.10       | 2.40±0.08       | 76.95±0.01      | 1.42±0.01    | 1.13±0.11    | 1.86±0.02      | 4.24±0.01    | 1.48±0.01    |
| 5                          | 0.44±0.01    | 25.43±0.01   | 1.27±0.01    | 18.11±0.02   | 16.78±0.01      | 2.61±0.05       | 1.49±0.03       | 77.26±0.01      | 5.34±0.04    | 0.76±0.01    | 1.24±0.01      | 2.35±0.02    | 0.59±0.01    |
| 6                          | 0.51±0.01    | 27.86±0.21   | 1.47±0.01    | 19.44±0.28   | 16.78±0.03      | -               | 2.37±0.04       | 77.51±0.03      | 1.16±0.02    | 0.20±0.01    | 0.37±0.01      | 2.93±0.08    | 0.82±0.03    |
| 7                          | 0.53±0.01    | 28.19±0.51   | 1.51±0.01    | 19.06±0.48   | 16.75±0.02      | -               | 2.54±0.10       | 77.54±0.09      | 1.10±0.03    | 0.20±0.01    | 0.37±0.01      | 2.67±0.09    | 0.85±0.03    |
| 8                          | 0.52±0.01    | 27.89±0.08   | 1.49±0.01    | 19.12±0.16   | 16.87±0.03      | -               | 2.41±0.04       | 77.55±0.14      | 1.12±0.01    | 0.21±0.01    | 0.39±0.01      | 2.72±0.05    | 0.75±0.02    |
| 9                          | 0.51±0.01    | 28.46±0.03   | 1.56±0.06    | 19.10±0.03   | 16.75±0.11      | -               | 2.72±0.02       | 77.51±0.10      | 1.09±0.01    | 0.20±0.01    | 0.41±0.01      | 2.53±0.01    | 0.51±0.01    |
| 10                         | 0.51±0.01    | 27.89±0.08   | 1.47±0.01    | 19.29±0.03   | 16.81±0.01      | -               | 2.41±0.06       | 77.50±0.02      | 1.14±0.01    | 0.21±0.01    | 0.38±0.01      | 2.81±0.01    | 0.78±0.01    |
| 11                         | 0.50±0.01    | 27.18±0.14   | 1.45±0.01    | 19.36±0.05   | 16.83±0.01      | -               | 2.33±0.03       | 77.57±0.12      | 1.20±0.02    | 0.19±0.01    | 0.37±0.01      | 3.10±0.08    | 1.07±0.10    |

**Supplemental tables:**

Table 4. The fatty acid compositions of sunflowerseed oil products stored at 40 °C without light exposure (Group IV).

| Storage<br>time<br>(month) | Fatty acids  |              |              |              |                 |                 |                 |                 |              |              |                |              |              |
|----------------------------|--------------|--------------|--------------|--------------|-----------------|-----------------|-----------------|-----------------|--------------|--------------|----------------|--------------|--------------|
|                            | C14:0<br>(%) | C16:0<br>(%) | C16:1<br>(%) | C18:0<br>(%) | C18:1n9c<br>(%) | C18:1n9t<br>(%) | C18:2n6t<br>(%) | C18:2n6c<br>(%) | C20:0<br>(%) | C20:1<br>(%) | C18:3n3<br>(%) | C22:0<br>(%) | C20:5<br>(%) |
| 0                          | 0.46±0.01    | 25.36±0.02   | 1.32±0.01    | 19.62±0.02   | 16.33±0.01      | 8.09±0.01       | 2.44±0.02       | 76.96±0.01      | 1.37±0.01    | 0.98±0.02    | 1.87±0.01      | 4.12±0.01    | 1.46±0.01    |
| 1                          | 0.46±0.01    | 25.44±0.02   | 1.30±0.01    | 19.56±0.03   | 16.32±0.01      | 8.12±0.01       | 2.37±0.03       | 76.96±0.01      | 1.37±0.01    | 1.10±0.01    | 1.90±0.03      | 4.09±0.01    | 1.48±0.01    |
| 2                          | 0.45±0.01    | 25.44±0.03   | 1.32±0.01    | 19.67±0.02   | 16.36±0.01      | 7.99±0.11       | 2.43±0.01       | 76.90±0.01      | 1.51±0.01    | 1.05±0.04    | 1.85±0.02      | 4.15±0.01    | 1.52±0.01    |
| 3                          | 0.44±0.01    | 25.37±0.02   | 1.33±0.01    | 19.56±0.01   | 16.41±0.01      | 7.83±0.02       | 2.43±0.01       | 76.87±0.02      | 1.49±0.07    | 1.13±0.07    | 1.94±0.06      | 4.13±0.01    | 1.52±0.02    |
| 4                          | 0.44±0.01    | 25.24±0.02   | 1.30±0.01    | 19.66±0.02   | 16.37±0.01      | 7.57±0.03       | 2.40±0.04       | 76.95±0.01      | 1.41±0.01    | 1.13±0.03    | 1.88±0.04      | 4.25±0.01    | 1.48±0.01    |
| 5                          | 0.44±0.01    | 25.44±0.01   | 1.27±0.01    | 18.13±0.05   | 16.79±0.01      | 2.58±0.04       | 1.46±0.01       | 77.24±0.01      | 5.35±0.01    | 0.75±0.03    | 1.24±0.01      | 2.37±0.06    | 0.63±0.06    |
| 6                          | 0.52±0.01    | 28.82±0.96   | 1.48±0.01    | 20.22±0.98   | 16.77±0.02      | -               | 2.25±0.02       | 77.45±0.37      | 1.20±0.06    | 0.20±0.01    | 0.38±0.01      | 3.03±0.25    | 0.85±0.08    |
| 7                          | 0.52±0.01    | 27.60±0.31   | 1.49±0.01    | 18.79±0.17   | 16.78±0.03      | -               | 2.50±0.01       | 77.59±0.02      | 1.10±0.01    | 0.20±0.01    | 0.38±0.01      | 2.68±0.01    | 1.01±0.01    |
| 8                          | 0.52±0.01    | 28.69±0.07   | 1.48±0.01    | 20.03±0.01   | 16.77±0.01      | -               | 2.37±0.05       | 77.36±0.01      | 1.18±0.01    | 0.21±0.01    | 0.39±0.01      | 2.95±0.02    | 0.82±0.01    |
| 9                          | 0.51±0.01    | 28.48±0.10   | 1.51±0.01    | 19.07±0.01   | 16.79±0.01      | -               | 2.72±0.04       | 77.47±0.02      | 1.08±0.01    | 0.20±0.01    | 0.41±0.01      | 2.52±0.01    | 0.51±0.01    |
| 10                         | 0.51±0.01    | 27.83±0.02   | 1.47±0.01    | 19.26±0.04   | 16.82±0.01      | -               | 2.44±0.05       | 77.50±0.01      | 1.14±0.01    | 0.20±0.01    | 0.38±0.01      | 2.81±0.01    | 0.78±0.01    |
| 11                         | 0.50±0.01    | 27.31±0.04   | 1.45±0.01    | 19.41±0.01   | 16.83±0.01      | -               | 2.32±0.16       | 77.48±0.01      | 1.19±0.01    | 0.19±0.01    | 0.38±0.01      | 3.08±0.01    | 1.09±0.10    |

**Supplemental tables:**

Table 5. The fatty acid compositions of sunflowerseed oil products stored at 55 °C without light exposure (Group V).

| Storage<br>time<br>(month) | Fatty acids  |              |              |              |                 |                 |                 |                 |              |              |                |              |              |
|----------------------------|--------------|--------------|--------------|--------------|-----------------|-----------------|-----------------|-----------------|--------------|--------------|----------------|--------------|--------------|
|                            | C14:0<br>(%) | C16:0<br>(%) | C16:1<br>(%) | C18:0<br>(%) | C18:1n9c<br>(%) | C18:1n9t<br>(%) | C18:2n6t<br>(%) | C18:2n6c<br>(%) | C20:0<br>(%) | C20:1<br>(%) | C18:3n3<br>(%) | C22:0<br>(%) | C20:5<br>(%) |
| 0                          | 0.46±0.01    | 25.36±0.02   | 1.32±0.01    | 19.62±0.02   | 16.33±0.01      | 8.09±0.01       | 2.44±0.02       | 76.96±0.01      | 1.37±0.01    | 0.98±0.02    | 1.87±0.01      | 4.12±0.01    | 1.46±0.01    |
| 1                          | 0.46±0.01    | 25.45±0.01   | 1.31±0.01    | 19.58±0.04   | 16.32±0.01      | 8.13±0.01       | 2.38±0.02       | 76.96±0.01      | 1.40±0.04    | 1.03±0.03    | 1.95±0.04      | 4.08±0.01    | 1.45±0.06    |
| 2                          | 0.45±0.01    | 25.46±0.02   | 1.33±0.01    | 19.70±0.01   | 16.39±0.01      | 8.10±0.08       | 2.46±0.04       | 76.85±0.01      | 1.49±0.02    | 1.11±0.04    | 1.91±0.03      | 4.11±0.02    | 1.48±0.02    |
| 3                          | 0.44±0.01    | 25.40±0.01   | 1.33±0.01    | 19.57±0.01   | 16.42±0.01      | 7.84±0.03       | 2.41±0.05       | 76.88±0.01      | 1.42±0.01    | 1.02±0.02    | 1.86±0.02      | 4.14±0.01    | 1.53±0.01    |
| 4                          | 0.44±0.01    | 25.31±0.02   | 1.31±0.01    | 19.72±0.01   | 16.42±0.01      | 7.58±0.05       | 2.41±0.03       | 76.89±0.01      | 1.42±0.01    | 1.12±0.03    | 1.87±0.03      | 4.25±0.02    | 1.48±0.01    |
| 5                          | 0.44±0.01    | 25.47±0.01   | 1.27±0.01    | 18.19±0.01   | 16.81±0.01      | 2.60±0.02       | 1.43±0.03       | 77.21±0.01      | 5.36±0.02    | 0.74±0.01    | 1.23±0.01      | 2.37±0.01    | 0.66±0.01    |
| 6                          | 0.52±0.01    | 28.16±1.00   | 1.48±0.01    | 19.64±1.23   | 16.81±0.04      | -               | 2.32±0.10       | 77.50±0.11      | 1.17±0.08    | 0.20±0.01    | 0.38±0.01      | 2.93±0.34    | 0.83±0.11    |
| 7                          | 0.52±0.01    | 28.35±0.32   | 1.49±0.01    | 19.60±0.16   | 16.79±0.01      | -               | 2.46±0.09       | 77.40±0.03      | 1.16±0.01    | 0.20±0.01    | 0.39±0.01      | 2.88±0.05    | 1.12±0.02    |
| 8                          | 0.52±0.01    | 28.03±0.81   | 1.48±0.01    | 19.37±0.78   | 16.90±0.05      | -               | 2.49±0.01       | 77.54±0.08      | 1.14±0.04    | 0.21±0.01    | 0.40±0.01      | 2.81±0.14    | 0.80±0.04    |
| 9                          | 0.50±0.01    | 28.31±0.30   | 1.55±0.05    | 19.17±0.07   | 16.84±0.02      | -               | 2.74±0.07       | 77.40±0.02      | 1.10±0.02    | 0.20±0.01    | 0.43±0.01      | 2.58±0.07    | 0.50±0.01    |
| 10                         | 0.51±0.01    | 27.95±0.05   | 1.48±0.01    | 19.31±0.02   | 16.87±0.01      | -               | 2.36±0.16       | 77.43±0.02      | 1.14±0.01    | 0.21±0.01    | 0.40±0.01      | 2.81±0.01    | 0.79±0.01    |
| 11                         | 0.50±0.01    | 27.47±0.09   | 1.46±0.01    | 19.45±0.03   | 16.87±0.01      | -               | 2.31±0.01       | 77.56±0.14      | 1.19±0.01    | 0.19±0.01    | 0.39±0.01      | 3.05±0.03    | 1.23±0.01    |

**Supplemental tables:**

Table 6. The fatty acid compositions of sunflowerseed oil products stored without light exposure at 70 °C for 1 month and then at room temperature for 10 months (Group VI).

| Storage<br>time<br>(month) | Fatty acids  |              |              |              |                 |                 |                 |                 |              |              |                |              |              |
|----------------------------|--------------|--------------|--------------|--------------|-----------------|-----------------|-----------------|-----------------|--------------|--------------|----------------|--------------|--------------|
|                            | C14:0<br>(%) | C16:0<br>(%) | C16:1<br>(%) | C18:0<br>(%) | C18:1n9c<br>(%) | C18:1n9t<br>(%) | C18:2n6t<br>(%) | C18:2n6c<br>(%) | C20:0<br>(%) | C20:1<br>(%) | C18:3n3<br>(%) | C22:0<br>(%) | C20:5<br>(%) |
| 0                          | 0.46±0.01    | 25.36±0.02   | 1.32±0.01    | 19.62±0.02   | 16.33±0.01      | 8.09±0.01       | 2.44±0.02       | 76.96±0.01      | 1.37±0.01    | 0.98±0.02    | 1.87±0.01      | 4.12±0.01    | 1.46±0.01    |
| 1                          | 0.46±0.01    | 25.44±0.03   | 1.30±0.01    | 19.60±0.07   | 16.34±0.02      | 8.17±0.02       | 2.38±0.01       | 76.94±0.05      | 1.38±0.01    | 1.00±0.02    | 1.92±0.08      | 4.11±0.04    | 1.49±0.02    |
| 2                          | 0.45±0.01    | 25.45±0.02   | 1.32±0.01    | 19.67±0.02   | 16.37±0.01      | 8.10±0.06       | 2.45±0.01       | 76.88±0.01      | 1.48±0.01    | 1.07±0.03    | 1.91±0.01      | 4.11±0.02    | 1.50±0.01    |
| 3                          | 0.44±0.01    | 25.39±0.01   | 1.33±0.01    | 19.57±0.01   | 16.41±0.03      | 7.84±0.06       | 2.37±0.05       | 76.89±0.01      | 1.44±0.03    | 1.04±0.01    | 1.89±0.02      | 4.14±0.01    | 1.53±0.02    |
| 4                          | 0.44±0.01    | 25.28±0.01   | 1.30±0.01    | 19.70±0.02   | 16.39±0.01      | 7.61±0.03       | 2.39±0.05       | 76.92±0.02      | 1.42±0.01    | 1.16±0.07    | 1.88±0.03      | 4.25±0.02    | 1.48±0.01    |
| 5                          | 0.44±0.01    | 25.45±0.01   | 1.27±0.01    | 18.17±0.02   | 16.80±0.01      | 2.61±0.06       | 1.51±0.06       | 77.23±0.03      | 5.28±0.07    | 0.76±0.01    | 1.25±0.01      | 2.36±0.01    | 0.58±0.11    |
| 6                          | 0.52±0.01    | 30.43±1.85   | 1.46±0.01    | 22.15±2.10   | 16.65±0.15      | -               | 2.36±0.17       | 77.02±0.33      | 1.32±0.13    | 0.20±0.01    | 0.38±0.01      | 3.48±0.49    | 0.99±0.15    |
| 7                          | 0.51±0.01    | 27.46±0.18   | 1.48±0.01    | 18.90±0.03   | 16.79±0.01      | -               | 2.45±0.11       | 77.59±0.01      | 1.12±0.01    | 0.20±0.01    | 0.38±0.01      | 2.78±0.06    | 0.90±0.02    |
| 8                          | 0.52±0.01    | 29.76±0.51   | 1.47±0.01    | 21.18±0.49   | 16.69±0.06      | -               | 2.27±0.09       | 77.25±0.10      | 1.25±0.03    | 0.28±0.01    | 0.39±0.01      | 3.19±0.10    | 1.01±0.09    |
| 9                          | 0.50±0.01    | 28.26±0.07   | 1.58±0.08    | 19.15±0.03   | 16.74±0.11      | -               | 2.69±0.02       | 77.61±0.12      | 1.09±0.01    | 0.20±0.01    | 0.41±0.01      | 2.58±0.02    | 0.50±0.01    |
| 10                         | 0.51±0.01    | 27.82±0.06   | 1.47±0.01    | 19.27±0.01   | 16.81±0.01      | -               | 2.47±0.16       | 77.50±0.01      | 1.14±0.01    | 0.21±0.01    | 0.38±0.01      | 2.81±0.01    | 0.78±0.01    |
| 11                         | 0.50±0.01    | 27.44±0.02   | 1.45±0.01    | 19.44±0.02   | 16.83±0.01      | -               | 2.26±0.04       | 77.55±0.13      | 1.19±0.01    | 0.19±0.01    | 0.37±0.01      | 3.03±0.03    | 1.08±0.09    |

**Supplemental tables:**

Table 7. The fatty acid compositions of sunflowerseed oil products stored with light exposure at 70 °C for 1 month and then at room temperature for 10 months (Group VII).

| Storage<br>time<br>(month) | Fatty acids  |              |              |              |                 |                 |                 |                 |              |              |                |              |              |
|----------------------------|--------------|--------------|--------------|--------------|-----------------|-----------------|-----------------|-----------------|--------------|--------------|----------------|--------------|--------------|
|                            | C14:0<br>(%) | C16:0<br>(%) | C16:1<br>(%) | C18:0<br>(%) | C18:1n9c<br>(%) | C18:1n9t<br>(%) | C18:2n6t<br>(%) | C18:2n6c<br>(%) | C20:0<br>(%) | C20:1<br>(%) | C18:3n3<br>(%) | C22:0<br>(%) | C20:5<br>(%) |
| 0                          | 0.46±0.01    | 25.36±0.02   | 1.32±0.01    | 19.62±0.02   | 16.33±0.01      | 8.09±0.01       | 2.44±0.02       | 76.96±0.01      | 1.37±0.01    | 0.98±0.02    | 1.87±0.01      | 4.12±0.01    | 1.46±0.01    |
| 1                          | 0.46±0.01    | 25.44±0.03   | 1.30±0.01    | 19.60±0.07   | 16.34±0.02      | 8.17±0.02       | 2.38±0.01       | 76.94±0.05      | 1.38±0.01    | 1.00±0.02    | 1.92±0.08      | 4.11±0.04    | 1.49±0.02    |
| 2                          | 0.45±0.01    | 25.49±0.02   | 1.33±0.01    | 19.72±0.03   | 16.38±0.01      | 8.07±0.04       | 2.44±0.01       | 76.86±0.02      | 1.49±0.01    | 1.06±0.05    | 1.88±0.06      | 4.13±0.01    | 1.51±0.01    |
| 3                          | 0.44±0.01    | 25.39±0.03   | 1.33±0.01    | 19.59±0.05   | 16.41±0.01      | 7.82±0.06       | 2.46±0.08       | 76.88±0.02      | 1.42±0.01    | 1.03±0.02    | 1.86±0.02      | 4.15±0.01    | 1.53±0.01    |
| 4                          | 0.44±0.01    | 25.26±0.04   | 1.30±0.01    | 19.70±0.04   | 16.38±0.02      | 7.60±0.05       | 2.48±0.05       | 76.92±0.02      | 1.43±0.02    | 1.12±0.05    | 1.85±0.01      | 4.25±0.01    | 1.52±0.01    |
| 5                          | 0.44±0.01    | 25.47±0.02   | 1.27±0.01    | 18.22±0.08   | 16.81±0.03      | 2.59±0.01       | 1.51±0.05       | 77.22±0.04      | 5.24±0.06    | 0.75±0.01    | 1.25±0.01      | 2.37±0.02    | 0.53±0.01    |
| 6                          | 0.52±0.01    | 29.51±0.87   | 1.47±0.01    | 20.79±0.76   | 16.73±0.03      | -               | 2.29±0.11       | 77.24±0.16      | 1.22±0.04    | 0.26±0.01    | 0.38±0.01      | 3.07±0.11    | 0.88±0.03    |
| 7                          | 0.52±0.01    | 27.70±0.39   | 1.49±0.01    | 18.96±0.28   | 16.79±0.01      | -               | 2.39±0.08       | 77.56±0.06      | 1.12±0.01    | 0.27±0.01    | 0.38±0.01      | 2.75±0.04    | 0.96±0.06    |
| 8                          | 0.52±0.01    | 29.64±0.76   | 1.48±0.01    | 20.97±0.78   | 16.73±0.04      | -               | 2.37±0.07       | 77.27±0.22      | 1.23±0.05    | 0.20±0.01    | 0.38±0.01      | 3.13±0.15    | 0.90±0.05    |
| 9                          | 0.50±0.01    | 28.31±0.15   | 1.54±0.07    | 19.11±0.06   | 16.79±0.02      | -               | 2.75±0.03       | 77.46±0.02      | 1.10±0.02    | 0.29±0.01    | 0.41±0.01      | 2.58±0.06    | 0.50±0.01    |
| 10                         | 0.53±0.02    | 27.92±0.04   | 1.48±0.01    | 19.32±0.03   | 16.65±0.02      | -               | 2.35±0.08       | 77.64±0.02      | 1.14±0.01    | 0.28±0.01    | 0.39±0.01      | 2.82±0.01    | 0.81±0.01    |
| 11                         | 0.50±0.01    | 27.23±0.04   | 1.45±0.01    | 19.43±0.04   | 16.84±0.01      | -               | 2.38±0.01       | 77.61±0.13      | 1.20±0.01    | 0.28±0.01    | 0.38±0.01      | 3.11±0.02    | 1.12±0.01    |
